# Supplementary material for: Increasing JAK/STAT Signaling Function of Infant CD4+ T Cells during the First Year of Life
Source: PubMed Central journal article supplement (PMC5318443; doi:10.3389/fped.2017.00015), 2017-02-21
Supplement: Image_4.pdf [file Image_4.pdf]

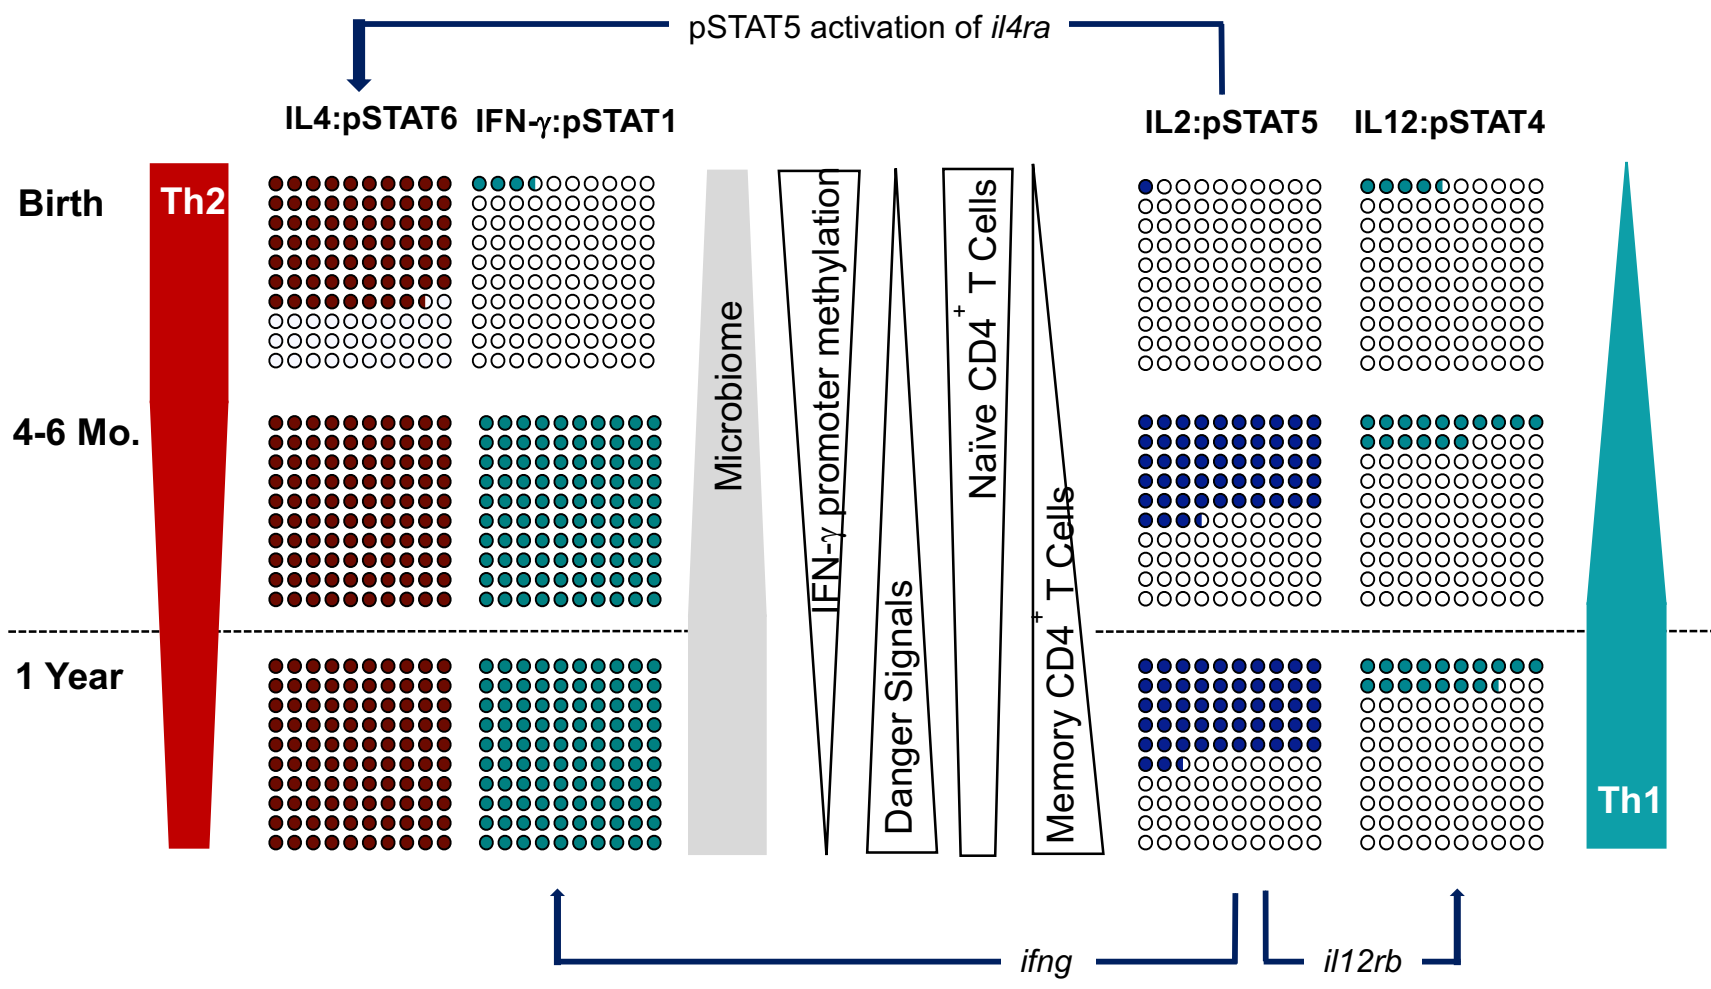

Figure S4  
 dela Pena-Ponce et al.
