# Supplementary material for: Increasing JAK/STAT Signaling Function of Infant CD4+ T Cells during the First Year of Life
Source: PubMed Central journal article supplement (PMC5318443; doi:10.3389/fped.2017.00015), 2017-02-21
Supplement: Table_1.pdf [file Table_1.pdf]

**Table S1: Age-dependent changes in STAT activation**

| Cytokine/STAT          | Cell Population            | Time Period (Months) | Spearman Correlation rho | p-value |
|------------------------|----------------------------|----------------------|--------------------------|---------|
| IL-4/ pSTAT6           | CD4 <sup>+</sup> T         | 0-14                 | 0.6075                   | <0.0001 |
|                        | CD4 <sup>+</sup> T (N)     |                      | 0.6415                   | <0.0001 |
|                        | CD4 <sup>+</sup> T (CM)    |                      | 0.4465                   | 0.0012  |
|                        | CD4 <sup>+</sup> T(EM/Eff) |                      | 0.7297                   | <0.0001 |
| IFN- $\gamma$ / pSTAT1 | CD4 <sup>+</sup> T         | 0-14                 | 0.7919                   | <0.0001 |
|                        | CD4 <sup>+</sup> T (N)     |                      | 0.7869                   | <0.0001 |
|                        | CD4 <sup>+</sup> T (CM)    |                      | 0.7247                   | <0.0001 |
|                        | CD4 <sup>+</sup> T(EM/Eff) |                      | 0.6682                   | <0.0001 |
| IL-2/ pSTAT5           | CD4 <sup>+</sup> T         | 0-14                 | 0.8197                   | <0.0001 |
|                        | CD4 <sup>+</sup> T (N)     |                      | 0.8040                   | <0.0001 |
|                        | CD4 <sup>+</sup> T (CM)    |                      | 0.8246                   | <0.0001 |
|                        | CD4 <sup>+</sup> T(EM/Eff) |                      | 0.8273                   | <0.0001 |
| IL-4/ pSTAT6           | CD4 <sup>+</sup> T         | 0-6                  | 0.5240                   | 0.0006  |
|                        | CD4 <sup>+</sup> T (N)     |                      | 0.5385                   | <0.0003 |
|                        | CD4 <sup>+</sup> T (CM)    |                      | 0.3387                   | 0.0349  |
|                        | CD4 <sup>+</sup> T(EM/Eff) |                      | 0.5608                   | 0.0003  |
| IFN- $\gamma$ / pSTAT1 | CD4 <sup>+</sup> T         | 0-6                  | 0.7193                   | <0.0001 |
|                        | CD4 <sup>+</sup> T (N)     |                      | 0.7625                   | <0.0001 |
|                        | CD4 <sup>+</sup> T (CM)    |                      | 0.7427                   | <0.0001 |
|                        | CD4 <sup>+</sup> T(EM/Eff) |                      | 0.5793                   | <0.0001 |
| IL-2/ pSTAT5           | CD4 <sup>+</sup> T         | 0-6                  | 0.6421                   | <0.0001 |
|                        | CD4 <sup>+</sup> T (N)     |                      | 0.6683                   | <0.0001 |
|                        | CD4 <sup>+</sup> T (CM)    |                      | 0.6654                   | <0.0001 |
|                        | CD4 <sup>+</sup> T(EM/Eff) |                      | 0.6957                   | <0.0001 |
| IL-4/ pSTAT6           | CD4 <sup>+</sup> T         | 7-14                 | -0.0766                  | 0.8643  |
| IFN- $\gamma$ / pSTAT1 | CD4 <sup>+</sup> T         | 7-14                 | -0.4206                  | 0.0457  |
| IL-2/ pSTAT5           | CD4 <sup>+</sup> T         | 7-14                 | 0.0000                   | >0.9999 |
